# Supplementary material for: Composite One- to Six-Scroll Hidden Attractors in a Memristor-Based Chaotic System and Their Circuit Implementation
Source: Hindawi journal article supplement (doi:10.1155/2020/3259468), 2020-11-20
Supplement: f1 [file 3259468.f1.zip]

Archive with 2 entries (2 files):
- mat.3259468.v1.rar
- supplementary instruction for the given supplementary material.doc
